# Supplementary material for: Cannabidiol-Loaded Mixed Polymeric Micelles of Chitosan/Poly(Vinyl Alcohol) and Poly(Methyl Methacrylate) for Trans-Corneal Delivery
Source: MDPI journal article supplement (doi:10.3390/pharmaceutics13122142), 2021-12-13
Supplement: s1 [file s1]

# Supplementary Materials: Cannabidiol-Loaded Mixed Polymeric Micelles of Chitosan/Poly(Vinyl Alcohol) and Poly(Methyl Methacrylate) for Trans-Corneal Delivery

Alejandro Sosnik, Ronya Ben Shabo and Hen Moshe Halamish

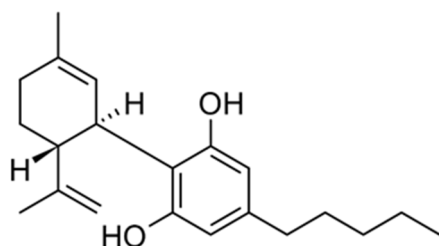

**Figure S1.** Chemical structure of cannabidiol (CBD).

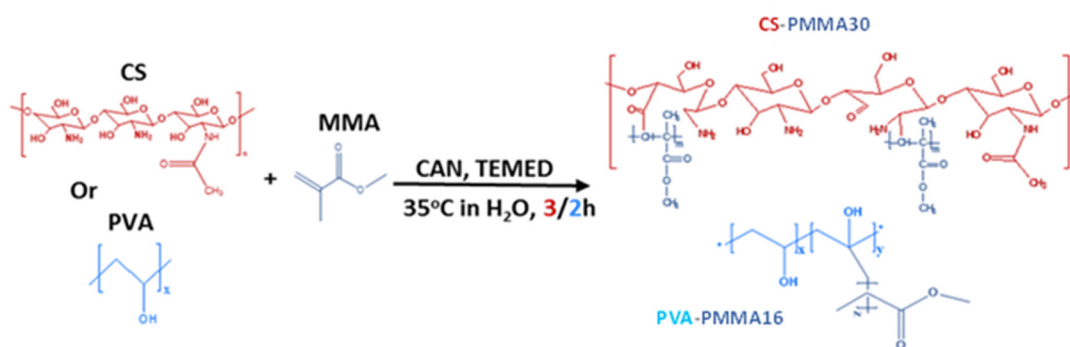

**Figure S2.** Synthetic pathway of CS-PMMA30 and PVA-PMMA16 copolymers by the free radical graft polymerization of MMA. The reaction time was 3 and 2 h for the synthesis of CS- and PVA-based copolymers, respectively.

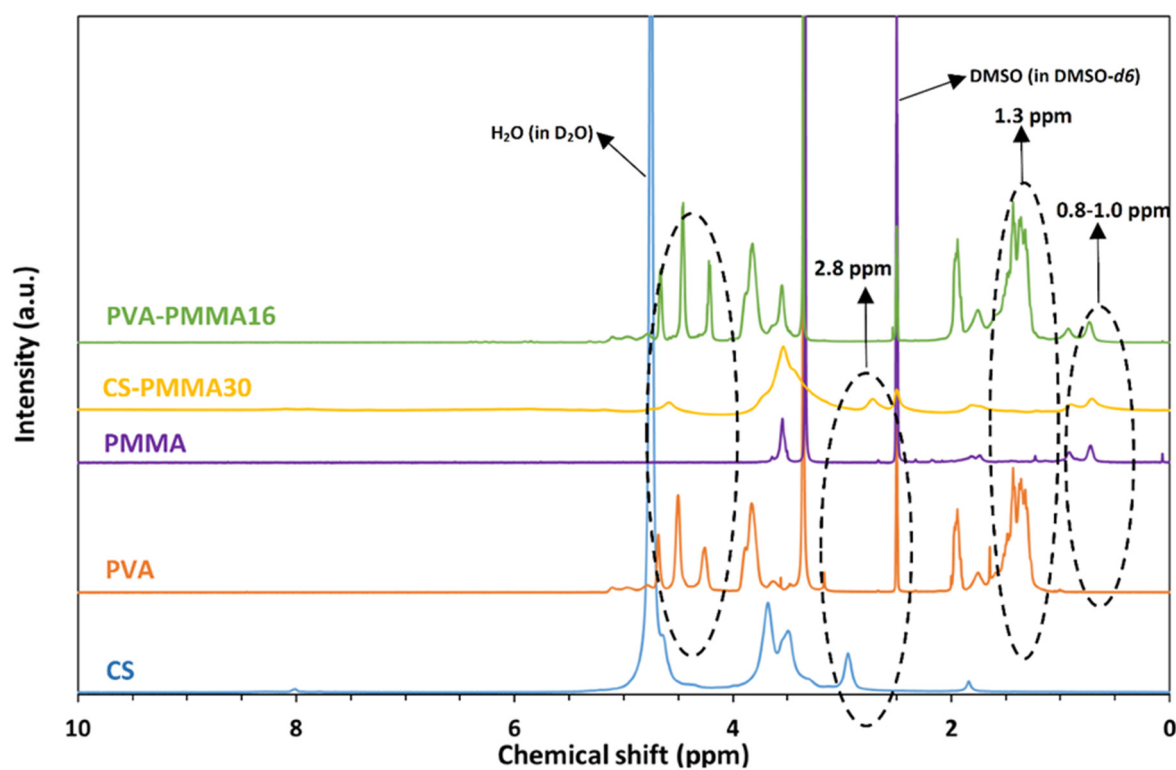

Figure S3.  $^1\text{H}$ -NMR spectra of pure CS (in  $\text{D}_2\text{O}$ ), pure PMMA, pure PVA, CS-PMMA30 and PVA-PMMA16 (in  $\text{DMSO}-d_6$ ).

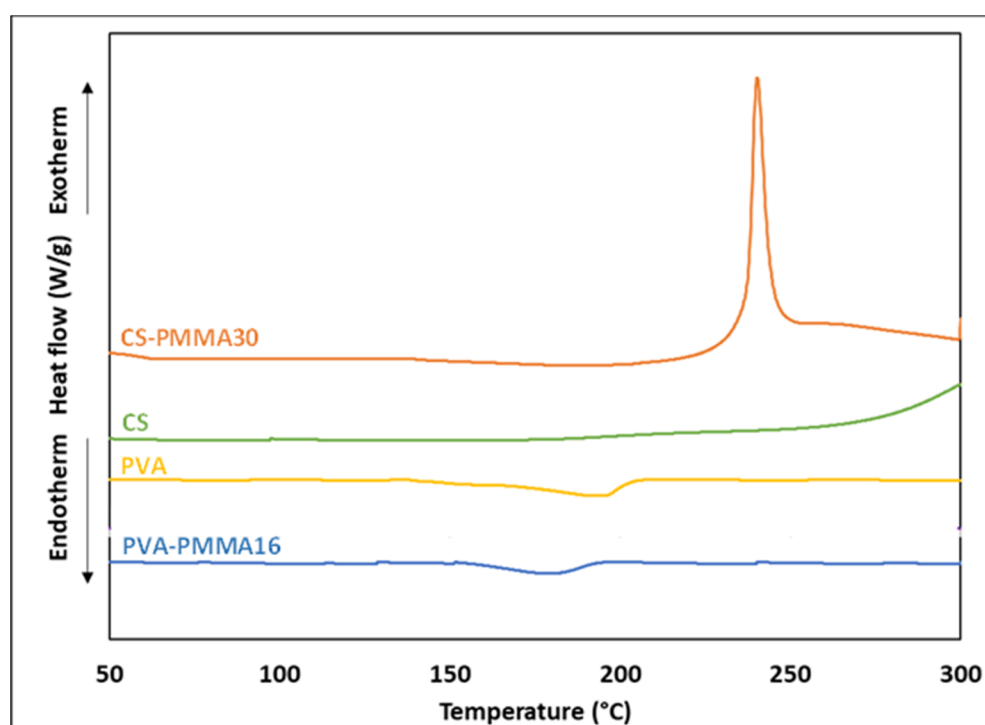

Figure S4. Thermal analysis of pristine polymers and graft copolymers, as measured by DSC.

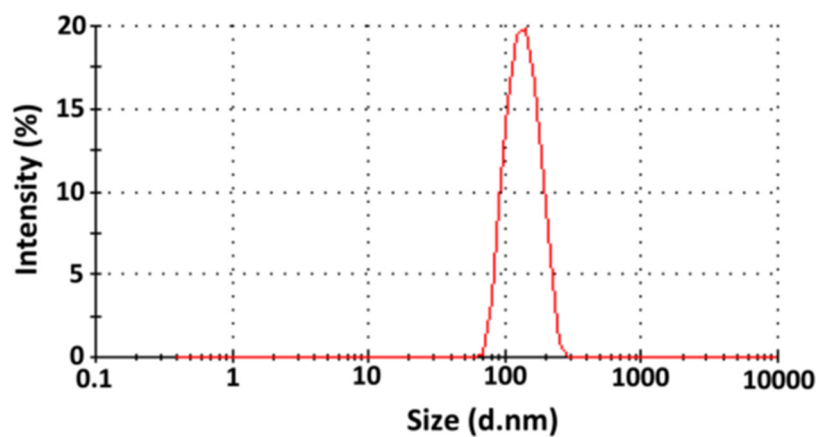

**Figure S5.** Size distribution plot of 0.1% *w/v* CBD-free crosslinked mixed PMs, as measured by DLS.

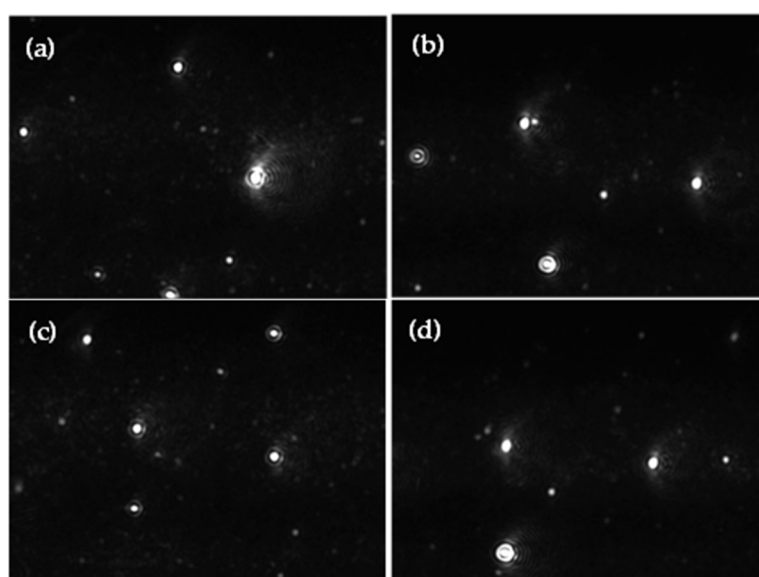

**Figure S6.** Representative NTA snapshots of (a) non-crosslinked mixed PMs, (b) crosslinked mixed PMs, (c) CBD-loaded non-crosslinked mixed PMs, and (d) CBD-loaded crosslinked mixed PMs, at 37 °C under scattering mode. The CBD loading is 20% *w/w*.
